# Supplementary material for: Computationally designed mRNA-launched protein nanoparticle vaccines
Source: PubMed Central journal article supplement (PMC11291046; doi:10.1101/2024.07.22.604655), 2024-07-23
Supplement: NIHPP2024.07.22.604655v1-supplement-4.pdf [file NIHPP2024.07.22.604655v1-supplement-4.pdf]

### Supplementary Table 1. Amino Acid Sequences of Proteins Used for Immunizations.

#### >Rpk9-I3-01NS

(MGILPSPGMPALLSLVSLLSVLLMGCVAETGT)RFPNITNLCPFGEVFNATRFASVYAWNRKRISNCVADFSVLYNSASFS  
TFKCYGVSPTKLNLCWNTNIYADSFVIRGDEVQRQIAPGQTGKIADYNYKLPDDFTGCVIAWNSNNLDSKVGGNYNLYRL  
FRKSNLKPFERDISTEIQAGSTPCNGVEGFNCYFPLQSYGFQPTNGVGYQPYRVVLSFELLHAPATVCGPKKSTGGS  
GGSGSGSGSGSGSEKAAKAEAAARKMEELFKKHKIVAVLRANSVEEAIEKAVAVFAGGVHLIEITFTVPDADTVIKELSFL  
KEMGAIIGAGTVTSVEQAREAVESGAEFIVSPHLDEEISQFAKEEGVFYMPGVMTPTTELVKAMKLGHTILKLFPGEVVGP  
QFVEAMKGPFPNVKFPVPTGGVNLNDVAEWFEGVQAVGVGEALNEGTPVEVAEKAKAFVEKIEGATE

#### >Rpk9-I53-50A

(MGILPSPGMPALLSLVSLLSVLLMGCVAETGT)RFPNITNLCPFGEVFNATRFASVYAWNRKRISNCVADFSVLYNSASFS  
TFKCYGVSPTKLNLCWNTNIYADSFVIRGDEVQRQIAPGQTGKIADYNYKLPDDFTGCVIAWNSNNLDSKVGGNYNLYRL  
FRKSNLKPFERDISTEIQAGSTPCNGVEGFNCYFPLQSYGFQPTNGVGYQPYRVVLSFELLHAPATVCGPKKSTGGS  
GGSGSGSGSGSGSEKAAKAEAAARKMEELFKKHKIVAVLRANSVEEAIEKAVAVFAGGVHLIEITFTVPDADTVIKALSVL  
KEKGAIIGAGTVTSVEQARKAVESGAEFIVSPHLDEEISQFAKEKGVFYMMPGVMTPTTELVKAMKLGHTILKLFPGEVVGPQ  
FVKAMKGPFPNVKFPVPTGGVNLNDVAEWFKAGVLAAGVGSALVKGTPDEVREKAKAFVEKIRGATEGGSHHHHHHHH

#### >S-2P-foldon

(MGILPSPGMPALLSLVSLLSVLLMGCVAETGT)QCVNLTTRTQLPPAYTNSFTRGVYYPDKVFRSSVLHSTQDLFLPFFS  
NVTWFHAIHVSGTNGTKRFDNPVLPFNDGVYFASTEKSNIIRGWIFGTTLDSTKQSLIVNATNVVIVKCEFCNDPFL  
GVYYHKNKSWMESEFRVYSSANNCTFEYVSQPFLMDLEGKQGNFKNLREFVFKNIDGYFKIYSKHTPINLVRDLPPQGF  
SALEPLVDLPIGINITRFQTLALHRSYLTGPDSSSGWTAGAAAYVGYLQPRFTLLKYNENGTITDAVDCALDPLSETKCT  
LKSFTVEKGIYQTSNFRVQPTESIVRFPNITNLCPFGEVFNATRFASVYAWNRKRISNCVADYSVLYNSASFSTFKCYGVS  
PTKLNLCFTNVYADSFVIRGDEVQRQIAPGQTGKIADYNYKLPDDFTGCVIAWNSNNLDSKVGGNYNLYRLFRKSNLKP  
FERDISTEIQAGSTPCNGVEGFNCYFPLQSYGFQPTNGVGYQPYRVVLSFELLHAPATVCGPKKSTNLVKNKCVNFN  
FNGLTGTGVLTESNKKFLPFQFGRDIADTTDAVRDPQTLLEILDITPCSFGGVSVITPGTNTSNQVAVLYQDVNCTEVPVAI  
HADQLTPTWRVYSTGSNVFQTRAGCLIGAEHVNSYECDIPIGAGICASYQTQTNPSGAGSVASQSIIAYTMSLGAENS  
VAYSNNSIAIPTNFTISVTTEILPVSMTKTSVDCTMYICGDSTECSNLLLQYGSFCTQLNRALTGIAVEQDKNTQEVFAQVK  
QIYKTPPIKDFGGFNFSQILPDPSPKRSFIEDLLFNKVTLADAGFIKQYGDCLGDIARDLCAQKFNGLTVLPLLLTDEM  
IAQYTSALLAGTITSGWTFGAGAALQIPFAMQMAYRFNGIGVTQNVLYENQKLIANQFNSAIGKIQDLSSTASALGKLQD  
VVNQAQALNTLVKQLSSNFGAISSVLNDILSRDPPEAEVQIDRLITGRLQSLQTYVTQQLIRAAEIRASANLAATKMSEC  
VLGQSKRVDFCGKGYHLSFPQSAPHGVVFLHVTYVPAQEKNFTTAPAICHGDKAHFPREGVFSNGTHWFVTVQRNFY  
EPQIITDNTFVSGNCDVVIGIVNNTVYDPLQPELDSFKEELDKYFKNHTSPDVLGDISGINASVNIQKEIDRLNEVAKN  
LNEIDLQELGKYEYIKGSGRENLYFQGGGGSGYIPEAPRDGQAYVRKDGGEWLLSTFLGHHHHHHHHH

#### >Rpk9-I53-50 (A component : B component)

(MGILPSPGMPALLSLVSLLSVLLMGCVAETGT)RFPNITNLCPFGEVFNATRFASVYAWNRKRISNCVADFSVLYNSASFS  
TFKCYGVSPTKLNLCWNTNIYADSFVIRGDEVQRQIAPGQTGKIADYNYKLPDDFTGCVIAWNSNNLDSKVGGNYNLYRL  
FRKSNLKPFERDISTEIQAGSTPCNGVEGFNCYFPLQSYGFQPTNGVGYQPYRVVLSFELLHAPATVCGPKKSTGGS  
GGSGSGSGSGSGSEKAAKAEAAARKMEELFKKHKIVAVLRANSVEEAIEKAVAVFAGGVHLIEITFTVPDADTVIKALSVL  
KEKGAIIGAGTVTSVEQARKAVESGAEFIVSPHLDEEISQFAKEKGVFYMMPGVMTPTTELVKAMKLGHTILKLFPGEVVGPQ  
FVKAMKGPFPNVKFPVPTGGVNLNDVAEWFKAGVLAAGVGSALVKGTPDEVREKAKAFVEKIRGATEGGSHHHHHHHH :  
MNQHSKDHETVRIAVRARWHAIEVDACVSAFEAAMRDIGGDRFAVDVFDVPGAYEIPLHARTLAETGRYGAVLGTAF  
VVNGGIYRHEFVASAVINGMMNVQLNTGVPVLSAVLTPHNYDKSKAHTLLFLALFAVKGMEARACVEILAAREKIAA

Signal peptides are indicated in parentheses.

**Supplementary Table 2. ORF Nucleic Acid Sequences of mRNA Constructs Used for Immunizations.**

**>Rpk9-I3-01NS**

AΨGGGCAΨCCΨGCCAAGCCCΨGGAAΨGCCΨGCCΨGCGΨGAGCCΨGGΨGΨCCCΨGCGΨGΨCΨGΨGCGΨGCGΨG  
AΨGGGAΨGCGΨGGCA)GAGACCGGCACAAGGΨΨCCCΨAACAΨCACCAAΨCΨGΨGCCAΨΨCGGCGAGGΨGΨ  
ΨΨAACGCCACACGCGΨΨΨGCCΨCCGΨGΨAΨGCCΨGGAACCGGAAGAGAAΨCΨCΨAAΨΨGCGΨGGCCGACΨΨ  
CAGCGΨGCGΨGΨACAAΨAGCGCCΨCCΨΨCΨΨACCΨΨAAGΨGCGΨAΨGGCGΨGAGCCCCACCAAGCΨGAAC  
GAΨCΨGΨGCGΨGGACAAACAΨΨΨACGCCGACΨCCΨΨGΨGAΨCCGGGGCGAΨGAAGΨGAGACAGAΨCGCAC  
CAGGACAGACCGGAAAGAΨCGCAGACΨACAACΨAΨAAGCΨGCCΨGACGAΨΨCACAGGCΨGCGΨGAΨCGCC  
ΨGGAAΨAGCAACAAΨCΨGGAΨΨCCAAAGΨGGGCGGCAACΨACAAΨΨAΨCΨGΨACAGGCΨGΨΨCCGCAAGΨ  
CCAACCΨGAAGCCAΨΨΨGAGCGGGACAΨCΨCCACCGAGAΨCΨACCAGGCCGGCΨCΨACACCCΨGCAACGGC  
GΨGGAGGGCΨΨCAAΨΨGΨΨAΨΨΨΨCCCCΨGCAGΨCΨΨACGGCΨΨCCAGCCΨACAAΨΨGGCGΨGGGCΨAΨ  
CAGCCAΨACCGGGΨGGΨGGΨGCGΨGΨCΨΨΨΨGAGCΨGCGΨGCACGCACCAGCAACCGΨGΨGCGGCCCCAAGA  
AGAGCACAGGAGGCΨCΨGGAGGCAGCGGCΨCCGGAGGCΨCΨGGAGGCAGCGGCΨCCGAGAAGGCCGCCAAG  
GCCGAGGAGGCCGCCAGGAAGAΨGGAGGAGCΨCΨΨAAGGAGCACAAAΨCΨGΨGGCGGΨGCGΨCAGGGCAAA  
ΨAGCGΨAGAAGAGGCCAAAAGAAGGCACΨCGCCGΨCΨΨCΨCGGAGGCGΨGGACCΨGAΨAGAGAΨCACAΨ  
ΨCACGGΨGCCAGAΨGCGΨGAΨACGGΨCAΨΨAAGGAGCΨGAGΨΨΨCΨCAAAGAGAΨGGGCGCCAΨCAΨAGG  
CGCCGGCACCGΨGACAΨCCGΨGGAGCAGGCCAGAGAAGCCGΨCGAGΨCCGGAGCCGAAΨΨCAΨAGΨGΨCCC  
CΨCAΨCΨCGAΨGAGGAGAΨCAGΨCAGΨΨΨGCCAAGGAGGAGGGAGΨGΨΨΨAΨAΨGCCCGGAGΨGAΨGAC  
GCCGACGGAGCΨAGΨGAAGGCCAΨGAAACΨGGGCCACACCAΨCCΨCAAGCΨGΨΨΨCCΨGGAGAAGΨGGΨΨ  
GGΨCCCCAAΨΨΨGΨCGAAGCCAΨGAAGGGACCAΨΨΨCCAAACGΨGAAAΨΨCGΨGCCGACCGGAGGAGΨΨAA  
CΨΨAGACAACGΨΨGCCGAGΨGGΨΨΨGAGGCAGGCGΨΨCAGGCGGΨCGGGGΨCGGAGAGGCCΨCAACGAA  
GGAACACCAGΨGGAAGΨCGCCGAGAAGGCCAAAGCAΨΨGΨGGAGAAAΨCGAGGGAGCCACΨGAAΨGAΨG  
A

**>Rpk9-I53-50A**

AΨGGGCAΨCCΨGCCAAGCCCΨGGAAΨGCCΨGCCΨGCGΨGAGCCΨGGΨGΨCCCΨGCGΨGΨCΨGΨGCGΨGCGΨG  
AΨGGGAΨGCGΨGGCA)GAGACCGGCACAAGGΨΨCCCΨAACAΨCACCAAΨCΨGΨGCCAΨΨCGGCGAGGΨGΨ  
ΨΨAACGCCACACGCGΨΨΨGCCΨCCGΨGΨAΨGCCΨGGAACCGGAAGAGAAΨCΨCΨAAΨΨGCGΨGGCCGACΨΨ  
CAGCGΨGCGΨGΨACAAΨAGCGCCΨCCΨΨCΨΨACCΨΨAAGΨGCGΨAΨGGCGΨGAGCCCCACCAAGCΨGAAC  
GAΨCΨGΨGCGΨGGACAAACAΨΨΨACGCCGACΨCCΨΨGΨGAΨCCGGGGCGAΨGAAGΨGAGACAGAΨCGCAC  
CAGGACAGACCGGAAAGAΨCGCAGACΨACAACΨAΨAAGCΨGCCΨGACGAΨΨCACAGGCΨGCGΨGAΨCGCC  
ΨGGAAΨAGCAACAAΨCΨGGAΨΨCCAAAGΨGGGCGGCAACΨACAAΨΨAΨCΨGΨACAGGCΨGΨΨCCGCAAGΨ  
CCAACCΨGAAGCCAΨΨΨGAGCGGGACAΨCΨCCACCGAGAΨCΨACCAGGCCGGCΨCΨACACCCΨGCAACGGC  
GΨGGAGGGCΨΨCAAΨΨGΨΨAΨΨΨΨCCCCΨGCAGΨCΨΨACGGCΨΨCCAGCCΨACAAΨΨGGCGΨGGGCΨAΨ  
CAGCCAΨACCGGGΨGGΨGGΨGCGΨGΨCΨΨΨΨGAGCΨGCGΨGCACGCACCAGCAACCGΨGΨGCGGCCCCAAGA  
AGAGCACAGGAGGCΨCΨGGAGGCAGCGGCΨCCGGAGGCΨCΨGGAGGCAGCGGCΨCCGAGAAGGCCGCCAAG  
GCCGAGGAGGCCGCCAGGAAGAΨGGAGGAGCΨGΨΨCAAGAAGCACAAGAΨCΨGΨGGCCGΨGCGΨGAGGGCCAA  
CAGCGΨGGAGGAGGCCAΨCGAGAAGGCAGΨGGCCGΨGΨΨCΨCGCAGGAGGAGΨGCACCΨGAΨCGAGAΨCACC  
ΨΨΨACAGΨGCCAGACGCCGAΨACCGΨGAΨCAAGGCCΨGΨCCGΨGCGΨGAAGGAGAAGGGAGCAAΨCAΨCG  
GAGCAGGCACCGΨGACAΨCΨGΨGGAGCAGGCAAGGAAGGCAGΨGGAGΨCΨGGAGCCGAGΨΨAΨCΨGΨGAG  
CCCCACCΨGGACGAGGAGAΨCΨCCAGΨΨCGCCAAGGAGAAGGGCGΨGΨΨΨACAΨGCCAGGCGΨGAΨG  
ACCCCCACAGAGCΨGGΨGAAGGCCAΨGAAGCΨGGGCCACACCAΨCCΨGAAGCΨGΨΨΨCCΨGGCGAGGΨGG  
ΨGGGACCCAGΨΨGΨGAAGGCCAΨGAAAGGCCCCΨΨCCCΨAAΨGΨGAAGΨΨΨGΨGCCACAGGCGGGCGΨ  
GAACCΨGGACAAΨGΨGGCAGAGΨGGΨΨCAAGGCAGGCGΨGCGΨGGCCGΨGGGAGΨGGGAGCGCCΨGGΨ  
GAAGGGCACCCΨGAΨGAGGΨGCGGGAGAAGGCCAAGGCCΨΨΨGΨGGAGAAGAΨCAGAGGCGCCACAGAGΨ  
GAΨGA

**>Membrane-anchored S-2P**

AΨGΨΨCGΨGΨΨCCΨGGΨGCΨGCΨGCCΨCΨGGΨGΨCCAGCCAGΨGΨGΨGAACCΨGACCACCAGAACACAG  
CΨGCCΨCCAGCCΨACACCAACAGCΨΨΨACCAGAGGCGΨGΨACΨACCCCGACAAGGΨGΨΨCAGΑΨCCAGCGΨ  
GCΨGCACΨCΨACCCAGGACCΨGΨΨCCΨGCCΨΨΨCΨCAGCAACGΨGACCΨGGΨΨCCACGCCAΨCCACGΨG  
ΨCCGGCACCAΑΨGGCACCAAGAGΑΨΨCGACAACCCCGΨGCΨGCCΨΨCΑACGACGGGGΨGΨACΨΨΨGCCAG  
CACCGAGAAGΨCCAACAΨCΑΨCAGAGGCΨGGAΨCΨΨCGGCACCACACΨGGACAGCAAGACCCAGAGCCΨGCΨ  
GAΨCGΨGAACAACGCCACCAACGΨGGΨCΑΨCΑAAGΨGΨGCGAGΨΨCCAGΨΨCΨGCAACGACCCΨΨCΨG  
GGCGΨCΨACΨACCACAAGAACAACAAGAGCΨGGAΨGGAΑAGCGAGΨΨCCGGGΨGΨACAGCAGCGCCAACAAC  
ΨGCACCΨΨCGAGΨACGΨGΨCCCAGCCΨΨΨCΨGAΨGGACCΨGGAAGGCAAGCAGGGCAACΨΨCΑAGAACC  
ΨGCGCGAGΨΨCGΨGΨΨAAGAACAΨCGACGGCΨACΨΨCΑAGAΨCΨACAGCAAGCACACCCΨAΨCΑACCΨC  
GΨGCGGGAΨCΨGCCΨCAGGGCΨΨCΨCΨGCΨCΨGGAACCCΨGGΨGGAΨCΨGCCAΨCGGCAΨCΑACAΨCΑ  
CCCGGΨΨCAGACACΨGCΨGGCCΨGCACAGAAGCΨACCΨGACACCΨGGCGAΨAGCAGCAGCGGAΨGGACA  
GCΨGGΨGCCCGCCΨΨACΨAΨGΨGGGCΨACCΨGCAGCCΨAGAACCΨΨCΨGCΨGAAGΨACAACGAGAACG  
GCACCAΨCACCGACGCCGΨGGAΨΨGΨGCΨCΨGGAΨCCΨCΨGAGCGAGACAAAGΨGCACCCΨGAAGΨCCΨΨ  
CACCGΨGGAAAGGGCAΨCΨACCAGACCAGCAACΨΨCCGGGΨGCAGCCCACCGAAΨCCAΨCGΨGCGGΨΨCC  
CCAΑΨAΨCACCΑAΨCΨGΨGCCCCΨΨCGGCGAGGΨGΨΨCΑAΨGCCACCAGΑΨΨCGCCΨCΨGΨΨACGCCΨG  
GAACCGGAAGCGGAΨCAGCAΑΨΨGCGΨGGCCGACΨACΨCCGΨGCΨGΨACAACΨCCGCCAGCΨΨCAGCACCΨ  
ΨCΑAGΨGCΨACGGCGΨGΨCCCCΨACCAAGCΨGAACGACCΨGΨGCΨΨCACAΑACGΨGΨACGCCGACAGCΨΨ  
CGΨGAΨCCGGGGAGΑΨGAAGΨGCGGCAGΑΨΨGCCCCΨGGACAGACAGGCAAGΑΨCGCCGACΨACAACΨACA  
AGCΨGCCCGACGACΨΨCACCGGCΨGΨGΨGAΨΨGCCΨGGAACAGCAACAACCΨGGACΨCCAAGΨCGGCGGC  
AACΨACAΑΨΨACCΨGΨACCGGCΨGΨΨCCGGAAGΨCCAΨCΨGAAGCCCΨΨCGAGCGGGACAΨCΨCCACCGA  
GAΨCΨAΨCAGGCCGGCAGCACCCΨΨGΨAACGGCGΨGGAAGGCΨΨCΑACΨGCΨACΨΨCCACΨGCAGΨCC  
ΨACGGCΨΨΨCAGCCACAAΑΨGGCGΨGGGCΨAΨCAGCCΨACAGAGΨGGΨGGΨGCΨGAGCΨΨCGAACΨGC  
ΨGCAΨGCCCCΨGCCACAGΨGΨGCGGCCΨAAGAAAGCACCAΑΨCΨCGΨGAAGAACAΑΨGCGΨGAACΨΨC  
AACΨΨCΑACGGCCΨGACCGGCACCGGCΨGCGΨGACAGAGAGCAACAAGAAGΨΨCCΨGCCAΨΨCCAGCAGΨΨ  
ΨGGCCGGGAΨAΨCGCCGAΨACCACAGACGCCGΨΨAGAGAΨCCCCAGACACΨGGAAΨCCΨGGACAΨCACCC  
CΨΨGCAGCΨΨCGGCGGAGΨGΨCΨGΨGAΨCACCCΨGGCACCAACACCAGCAΑΨCAGGΨGGCAGΨGCΨGΨA  
CCAGGACGΨGAACΨGΨACCGAAGΨGCCCGΨGGCCAΨΨCACGCCGAΨCAGCΨGACACCΨACAΨGGCGGGΨG  
ΨACΨCCACCGGCAGCAΑΨGΨGΨΨCAGACCAGAGCCGGCΨGΨCΨGAΨCGGAGCCGAGCACGΨGAACAΨAG  
CΨACGAGΨGCGACAΨCCCCAΨCGGCGCΨGGAAΨCΨGCGCCAGCΨACCAGACACAGACAΑACAGCCCΨCGGAG  
AGCCAGAAGCGΨGGCCAGCCAGAGCAΨCΑΨΨGCCΨACACAΑΨGΨCΨCΨGGGCGCCGAGAACAGCGΨGGCCΨ  
ACΨCCAACAACΨCΨAΨCGCΨAΨCCCCACCAACΨΨCACCΑΨCAGCGΨGACCACAGAGAΨCCΨGCCΨGΨGΨCC  
AΨGACCAAGACCAGCGΨGGACΨGCACCAΨGΨACAΨCΨGCGGCCGAΨΨCCACCGAGΨGCΨCCAACCΨGCΨGCΨ  
GCAGΨACGGCAGCΨΨCΨGCACCCAGCΨGAΑΨAGAGCCCΨGACAGGGAΨCGCCGΨGGAACAGGACAAGAACA  
CCCCAAGAGGΨGΨΨCGCCΑAGΨGAAGCAGΑΨCΨACAAGACCCΨCCΨAΨCΑAGGACΨΨCGGCGGCΨΨCΑAΨ  
ΨΨCAGCCAGΑΨΨCΨGCCGAΨCCΨAGCAAGCCAGCAAGCGGAGCΨΨCΑΨCGAGGACCΨGCΨGΨΨCΑACAΑ  
AGΨGACACΨGGCCGACGCCGGCΨΨCΑΨCΑAGCAGΨAΨGGCGAΨΨGΨCΨGGGCGACAΨΨGCCGCCAGGGAΨ  
CΨGAΨΨΨGCGCCAGAAGΨΨAACGGACΨGACAGΨGCΨGCCΨCCΨCΨGCΨGACCGAΨGAGAΨGAΨCGCCC  
AGΨACACAΨCΨGCCΨGCΨGGCCGGCACAAΨCACAAGCGGCΨGGACAΨΨΨGGAGCAGGCGCCGCΨCΨGCA  
GAΨCCCCΨΨΨGCΨAΨGCAGΑΨGGCCΨACCGGΨΨCΑACGGCAΨCGGAGΨGACCCAGAAΨGΨGCΨGΨACGAG  
AACCAGAAGCΨGAΨCGCCAACCAGΨΨCΑACAGCGCCAΨCGGCAAGΑΨCCAGGACAGCCΨGAGCAGCACAGCA  
AGCGCCCΨGGGAAAGCΨGCAGGACGΨGGΨCΑACCAGAAΨGCCAGGCACΨGAACACCCΨGGΨCΑAGCAGCΨ  
GΨCCΨCCAACΨΨCGGCGCCAΨCAGCΨCΨGΨGCΨGAACGAΨAΨCCΨGAGCAGACΨGGACCCΨCCΨGAGGCC  
GAGGΨGCAGΑΨCGACAGACΨGAΨCACAGGCAGACΨGCAGAGCCΨCCAGACAΨACGΨGACCCAGCAGCΨGAΨ  
CAGAGCCGCCGAGΑΨΨAGAGCCΨCΨGCCAΑΨCΨGGCCGCCACCAAGΑΨGΨCΨGAGΨGΨGΨGCΨGGGCCAG  
AGCAAGAGAGΨGGACΨΨΨGCGGCAAGGGCΨACCACCΨGAΨGAGCΨΨCCΨCAGΨCΨGCCCCΨCACGGCG  
ΨGGΨGΨΨCΨGCACGΨGACAΨAΨGΨGCCCGCΨCΑAGAGAAGAAΨΨΨCACCACCGCΨCCAGCCAΨCΨGCCA  
CGACGGCAΑAGCCCACΨΨCΨAGAGAAGGCGΨGΨCΨGΨCΨCΑACGGCACCCΑΨΨGGΨΨCGΨGACACAG  
CGGAACΨΨCΨACGAGCCCCAGΑΨCΑΨCACCACCGACAACACCΨΨCGΨGΨCΨGGCAACΨGCGACGΨCGΨGAΨ

CGGCAΨΨGΨGAACAAΨACCGΨGΨACGACCCΨCΨGCAGCCCGAGCΨGGACAGCΨΨCAAAGAGGAACΨGGACA  
AGΨACΨΨΨAAGAACCACACAAGCCCCGACGΨGGACCΨGGGCGAΨAΨCAGCGGAAΨCAAΨGCCAGCGΨCGΨG  
AACAΨCCAGAAAGAGAΨCGACCGGCΨGAACGAGGΨGGCCAAGAAΨCΨGAACGAGAGCCΨGAΨCGACCΨGCAA  
GAACΨGGGGAAGΨACGAGCAGΨACAΨCAAGΨGGCCCΨGGΨACAΨCΨGGCΨGGGCΨΨAΨCGCCGGACΨGA  
ΨΨGCCAΨCGΨGAΨGGΨCACAΨCAΨGCΨGΨGΨGCAΨGACCAGCΨGCΨGΨAGCΨGCCΨGAAGGGCΨGΨΨ  
GΨAGCΨGΨGGCAGCΨGCΨGCAAGΨΨCGACGAGGACGAΨΨCΨGAGCCCGΨGCΨGAAGGGCGΨGAAACΨGCA  
CΨACACAΨGAΨGA

**>Luciferase**

AΨGGAAGAΨGCCAAAAACAΨΨAAGAAGGGCCCCAGCGCCAΨΨCΨACCCACΨCGAAGACGGGACCGCCGGCGAG  
CAGCΨGCACAAAGCCAΨGAAGCGCΨACGCCΨGGΨGCCCGGCACCAΨCGCCΨΨΨACCGACGCACAΨAΨCGA  
GGΨGGACAΨΨACCΨACGCCGAGΨACΨΨCGAGAΨGAGCGΨΨCGGCΨGGCAGAAGCΨAΨGAAGCGCΨAΨGGG  
CΨGAAΨACAAACCAΨCGGAΨCGΨGGΨGΨGCAGCGAGAAΨAGCΨΨGCAGΨΨCΨCAΨGCCCCΨGΨΨGGGΨ  
GCCΨΨGΨΨCAΨCGGΨGΨGGCΨGΨGGCCCCAGCΨAACGACAΨCΨACAACGAGCGCGAGCΨGCΨGAACAGCA  
ΨGGGCAΨCAGCCAGCCCACCGΨCGΨAΨΨCGΨGAGCAAGAAAGGGCΨGCAAAAGAΨCCΨCAACGΨGCAAAAG  
AAGCΨACCGAΨCAΨACAAAAGAΨCAΨCAΨCAΨGGAΨAGCAAGACCGACΨACCAGGGCΨΨCCAAAGCAΨGΨAC  
ACCΨΨCGΨGACΨΨCCCAΨΨΨGCCACCCGGCΨΨCAACGAGΨACGACΨΨCGΨGCCCGAGAGCΨΨCGACCCGGG  
ACAAAACCAΨCGCCCΨGAΨCAΨGAACAGΨAGΨGGCAGΨACCAGGΨΨGCCCAAGGGCGΨAGCCCΨACCAGCAC  
CGCACCCGΨΨGΨΨCCGAΨΨCAGΨCAΨGCCCCGCGACCCCAΨCΨΨCGGCAACCAGAΨCAΨCCCCGACACCCG  
ΨAΨCCΨCAGCGΨGGΨGCCAΨΨΨCACCACGGCΨΨCGGCAΨGΨΨCACCACGCΨGGGCΨACΨΨGAΨCΨGCGG  
CΨΨΨCGGGΨCGΨGCΨCAΨGΨACCGCΨΨCGAGGAGGAGCΨAΨΨCΨΨGCGCAGCΨΨGCAAGACΨAΨAAGAΨ  
ΨCAAΨCΨGCCCΨGCΨGGΨGCCACACΨAΨΨΨAGCΨΨCΨΨCGCΨAAGAGCACΨCΨCAΨCGACAAGΨACGAC  
CΨAAGCAACΨΨGCACGAGAΨCGCCAGCGGGCGGGCGCCGCΨCAGCAAGGAGGΨAGGΨGAGGCCGΨGGCCAA  
ACGCΨΨCCACCΨACCAGGCAΨCCGACAGGGCΨACGGCCΨGACAGAAACAACCAGCGCCAΨΨCΨGAΨCACCCC  
CGAAGGGGACGACAAGCCΨGGCGCAGΨAGGCAAGGΨGGΨGCCΨΨCΨΨCGAGGCΨAAGGΨGGΨGGACΨΨG  
GACACCCGΨAAGACACΨGGGΨGΨGAACCAGCGGGCGAGCΨGΨGCGΨCCGΨGGCCCCAΨGAΨCAΨGAGCG  
GCΨACGΨΨAACAACCCCGAGGCΨACAAACGCΨCΨCAΨCGACAAGGACGGCΨGGCΨGCACAGCGGGCACAΨC  
GCCΨACΨGGGACGAGGACGAGCACΨΨCΨΨCAΨCGΨGGACCGGCΨGAAGΨCCCΨGAΨCAAΨACAAGGGCΨ  
ACCAGGΨAGCCCCAGCCGAACΨGGAGAGCAΨCCΨGCΨGCAACACCCCAACAΨCΨΨCGACGCCGGGGΨCGCC  
GGCCΨGCCCGACGACGAΨGCCGGCGAGCΨGCCCGCCGACGΨCGΨCGΨGCΨGGAACACGGΨAAAACCAΨGAC  
CGAGAAGGAGAΨCGΨGGACΨAΨGΨGGCCAGCCAGGΨΨACAACCGCCAAGAAGCΨGCGCGGΨGGΨGΨΨGΨG  
ΨΨCGΨGGACGAGGΨGCCΨAAAGGACΨGACCGGCAAGΨΨGGACGCCCGCAAGAΨCCGCGAGAΨΨCΨCAΨΨA  
AGGCCAAGAAGGGCGGCAAGAΨCGCCGΨG

Ψ, N1-methylpseudouridine-5'-triphosphate
